# Supplementary material for: MOfinder: A Novel Algorithm for Detecting Overlapping Modules from Protein-Protein Interaction Network
Source: Hindawi journal article supplement (doi:10.1155/2012/103702), 2012-01-01
Supplement: f1 [file 103702.f1.pdf]

Supplementary Table 1 Statistics for the major module size and other features when applied six methods to the human PPI data.

| Methods  | Major module size | Predicted module | Covered proteins | Functional percentage |
|----------|-------------------|------------------|------------------|-----------------------|
| MCODE    | 3                 | 41               | 124              | 58.5%                 |
| CFinder  | 4                 | 123              | 417              | 61.0%                 |
| COACH    | 3                 | 818              | 1874             | 50.4%                 |
| NeMo     | 4                 | 281              | 1125             | 47.3%                 |
| LPCF     | 10                | 2595             | 7654             | 67.7%                 |
| MOfinder | 5                 | 137              | 415              | 84.7%                 |
